# Supplementary material for: Home-monitoring reduces hospital stay for COVID-19 patients
Source: PubMed Central journal article supplement — Eur Respir J. 2021 Nov 18;58(5):2101871. doi: 10.1183/13993003.01871-2021 (PMC8462014; doi:10.1183/13993003.01871-2021), 2021-11-18

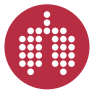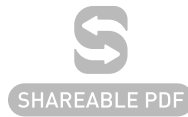

# Home-monitoring reduces hospital stay for COVID-19 patients

Laura Agnes Grutters <sup>1,4</sup>, Kalle Iskander Majoor<sup>1,4</sup>, Eline Solange Kirsty Pol-Mattern<sup>1</sup>,  
Johannes Anthonie Hardeman<sup>1</sup>, Christiaan Franciscus Pieter van Swol<sup>2</sup> and  
Adriane Dore Marie Vorselaars<sup>1,3</sup>

<sup>1</sup>Interstitial Lung Diseases Center of Excellence, Dept of Pulmonology, St Antonius Hospital, Nieuwegein, The Netherlands. <sup>2</sup>Dept of Medical Physics, St. Antonius Hospital, Nieuwegein, The Netherlands. <sup>3</sup>Division of Heart and Lungs, Utrecht University Medical Centre, Utrecht, The Netherlands. <sup>4</sup>These authors contributed equally to the work.

Corresponding author: Adriane Dore Marie Vorselaars ([a.vorselaars@antoniusziekenhuis.nl](mailto:a.vorselaars@antoniusziekenhuis.nl))

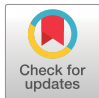

Shareable abstract (@ERSpublications)

**Home monitoring reduces hospital stay of patients with COVID-19, which increases regular healthcare capacity** <https://bit.ly/3CdFp1z>

**Cite this article as:** Grutters LA, Majoor KI, Pol-Mattern ESK, *et al.* Home-monitoring reduces hospital stay for COVID-19 patients. *Eur Respir J* 2021; 58: 2101871 [DOI: 10.1183/13993003.01871-2021].

This single-page version can be shared freely online.

Copyright ©The authors 2021.

This version is distributed under the terms of the Creative Commons Attribution Non-Commercial Licence 4.0. For reproduction rights and permissions contact [permissions@ersnet.org](mailto:permissions@ersnet.org)

Received: 2 July 2021  
Accepted: 8 Sept 2021

*To the Editor:*

With great interest we read the article by DIRIKGIL *et al.* [1], in which they demonstrate the potential of home monitoring to reduce hospital admissions by safely surveying clinical symptoms and vital parameters. They encourage the further consideration of strategies for home monitoring larger patient groups and, particularly, patients with confirmed coronavirus disease 2019 (COVID-19).

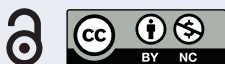

Supplement: ERJ-01871-2021.Shareable.pdf [file ERJ-01871-2021.Shareable.pdf]
